# Supplementary material for: Draft genome of a porcupinefish, Diodon Holocanthus
Source: bioRxiv or medRxiv preprint supplement (doi:10.1101/775387), 2019-09-25
Supplement: Supplementary file [file media-1.pdf]

## Supplementary Information: Draft genome of a porcupinefish, *Diodon Holocanthus*

Mengyang Xu<sup>1,2,3,\*</sup>, Xiaoshan Su<sup>1,2,3,\*</sup>, Mengqi Zhang<sup>1,2,3,\*</sup>, Ming Li<sup>1,4,5,\*</sup>, Xiaoyun Hunag<sup>1,2,3,\*</sup>, Guangyi Fan<sup>1,2,3,#</sup>

<sup>1</sup>BGI-Qingdao, BGI-Shenzhen, Qingdao, 266555, China;

<sup>2</sup>BGI-Shenzhen, Beishan Industrial Zone, Yantian District, Shenzhen 518083, China;

<sup>3</sup>China National Gene Bank, BGI-Shenzhen, Jinsha Road, Shenzhen 518120, China;

<sup>4</sup>College of Fisheries and Life Science, Shanghai Ocean University, Shanghai 201306, China

<sup>5</sup>Yellow Sea Fisheries Research Institute, Chinese Academy of Fishery Sciences (CAFS), Key Laboratory for Sustainable Development of Marine Fisheries, Ministry of Agriculture, Qingdao 266071, China

\*These authors contributed equally to this work

#These authors jointly supervised this work

Corresponding to fanguangyi@genomics.cn (G.F.)

| Platform                | Metric                | Value   |
|-------------------------|-----------------------|---------|
| stLFR co-barcoded reads | Insert Size           | 250     |
|                         | Read length (bp)      | 100     |
|                         | Total data (Gb)       | 154.3   |
|                         | Sequence coverage (×) | 219.8   |
|                         | # of Reads            | 655,108 |
| MinION long reads       | Average length (bp)   | 17,378  |
|                         | Total data (Gb)       | 11.4    |
|                         | Sequence coverage (×) | 15.9    |

**Table S1. Descriptive metrics of the input sequence data for the *de novo* genome assembly.**

| Kmer | Kmer Depth | Kmer Number    | Estimated genome size (Mb) | Heterozygous Rate (%) | Repeat Rate (%) |
|------|------------|----------------|----------------------------|-----------------------|-----------------|
| 17   | 110        | 78,590,182,272 | 701.96                     | 0.76                  | 36.35           |

**Table S2. Estimation of the genome size, heterozygous and repeat rate using K-mer analysis.**

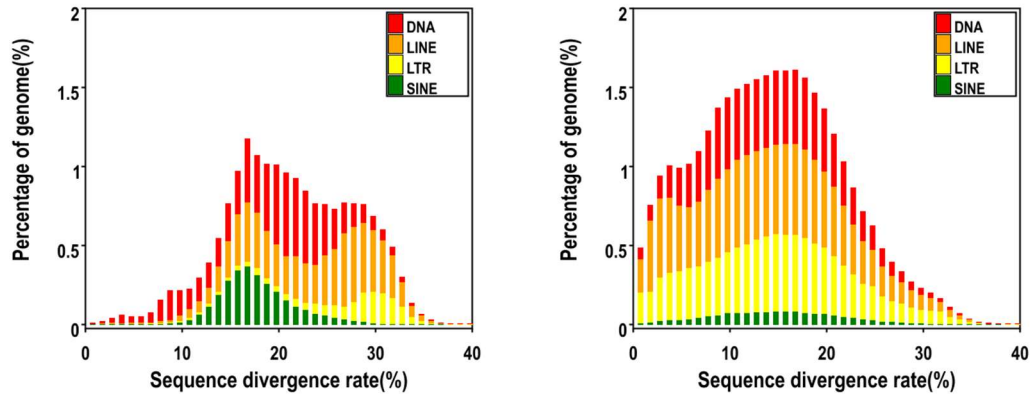

Figure S1. Statistics of repeat elements in the *Diodon Holocanthus* genome.

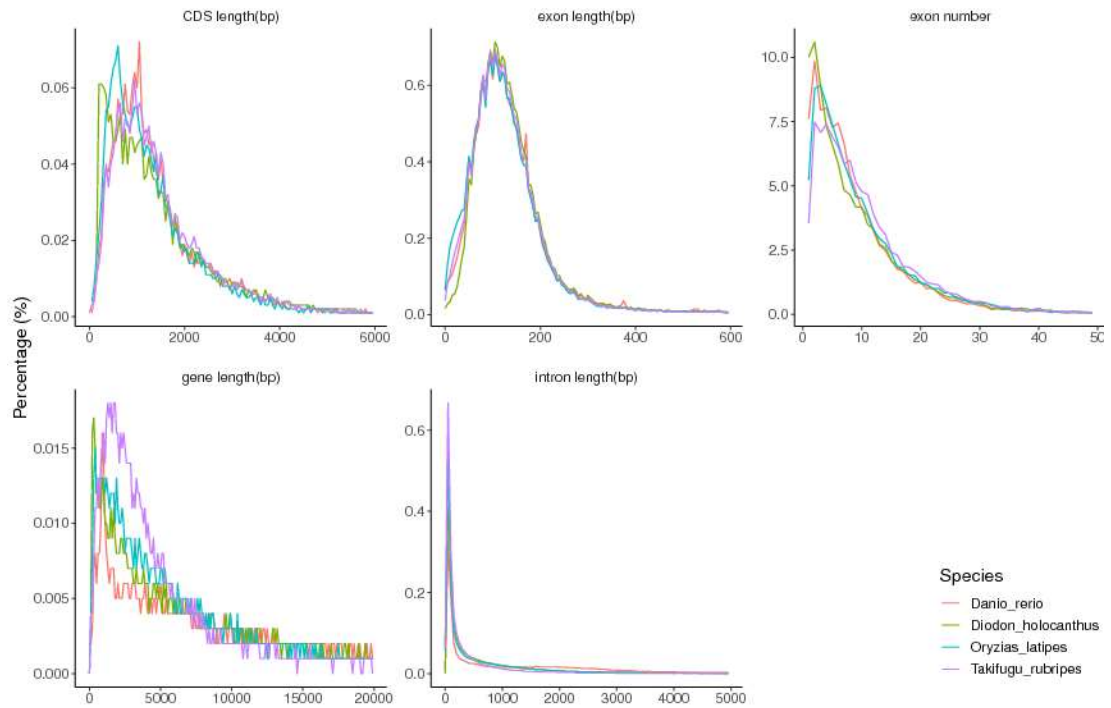

Figure S2. Length distribution comparison on total gene, CDS, exon, and intron of annotated gene models of the *Diodon Holocanthus* with other species. Length distribution of total genes (A), CDS (B), exon (C), and intron (D) were compared to those of *Danio rerio*, *Oryzias latipes* and *Takifugu rubripes*.

| Values     | Total  | Swissprot-<br>Annotated | TrEMBL-<br>Annotated | Interpro-<br>Annotated | Overall |
|------------|--------|-------------------------|----------------------|------------------------|---------|
| Number     | 20,840 | 17,015                  | 18,214               | 4,812                  | 18,281  |
| Percentage | 100%   | 81.65%                  | 87.40%               | 23.09%                 | 87.72%  |

Table S3. The number of genes with homology or functional classification for *Diodon Holocanthus*.
